# Supplementary material for: A cancer-targeted drug delivery system developed with gold nanoparticle mediated DNA–doxorubicin conjugates
Source: Royal Society of Chemistry journal article supplement (doi:10.1039/c4ra06298a), 2014-01-01
Supplement: c4ra06298a1.pdf [file c4ra06298a1.pdf]

## Supporting Information

*for*

### **A cancer-targeted drug delivery system developed with gold nanoparticles mediated DNA-doxorubicin conjugates**

**Yu Qing Du,<sup>a</sup> Xiao Xi Yang,<sup>a</sup> Wen Long Li,<sup>b</sup> Jian Wang<sup>\*,a</sup> and Cheng Zhi Huang<sup>\*,a</sup>**

<sup>a</sup> *Key Laboratory of Luminescence and Real-Time Analytical Chemistry (southwest University),  
Ministry of Education, College of Pharmaceutical Sciences , Southwest University, 400715  
Chongqing, PR China.*

<sup>b</sup> *College of Chemistry and Chemical Engineering, Southwest University, 400715 Chongqing, PR  
China*

*E-mail: wj123456@swu.edu.cn; chengzhi@swu.edu.cn*

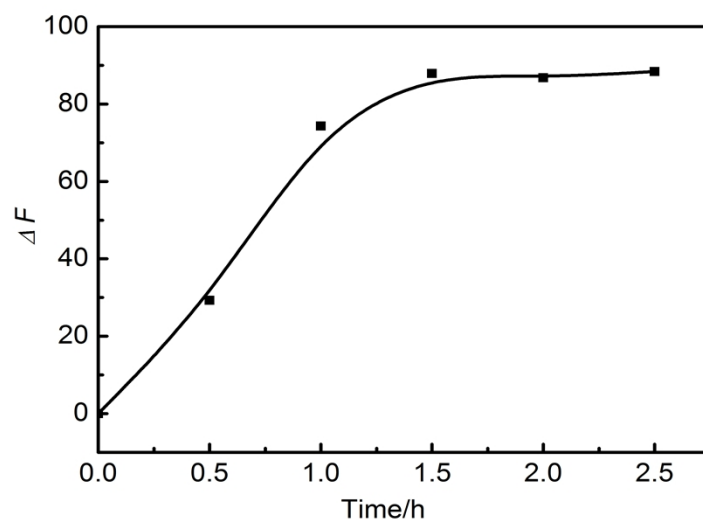

**Fig. S1** Optimization of the reaction time between AuNPs-DNA(Dox) and PrPC. Concentrations, AuNPs-DNA(Dox), 2nM; PrPC, 200nM.

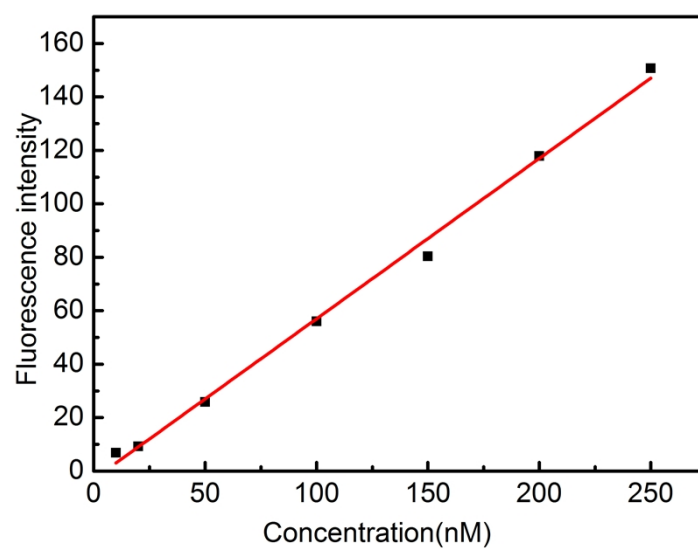

**Fig. S2** The standard linear calibration curve of Dox. ( $\lambda_{\text{ex}}$ , 490nm;  $\lambda_{\text{em}}$ , 562nm)

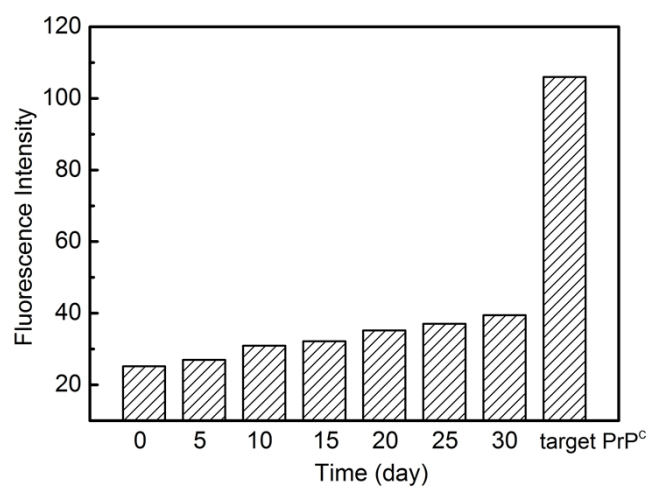

Fig. S3 The stability of the AuNPs-DNA(Dox) complex. The fluorescence of 2 nM AuNP-MB(Dox) was measured at 0, 5, 10, 15, 20, 25, 30 day, and target PrP<sup>C</sup> was added after 30 day.  $\lambda_{ex}$ , 490 nm;  $\lambda_{em}$ , 562 nm.
